# Supplementary material
Source: publisher site journal article supplement (https://static.cambridge.org/content/id/urn:cambridge.org:id:article:S2040174422000381/resource/name/S2040174422000381supp001.docx)
Supplement: Supplementary file 1 [file S2040174422000381supp001.docx]

Supplementary Table S1. Sample Sizes for Each Outcome and N (%) by Pregnancy Glucose Status in Project Viva

| **Outcome** | **N** | **NGT** | **IH** | **IGT** | **GDM** |
| --- | --- | --- | --- | --- | --- |
| Any of the outcomes | 928 | 773 (83%) | 82 (9%) | 25 (3%) | 48 (5%) |
| Hair cortisol at mid-childhood | 632 | 527 (83%) | 57 (9%) | 19 (3%) | 29 (5%) |
| Hair cortisol at early adolescence | 563 | 466 (83%) | 55 (10%) | 15 (3%) | 27 (5%) |
| Hair cortisol at both time points | 452 | 374 (83%) | 43 (10%) | 12 (3%) | 23 (5%) |
| Cord blood outcomes a | 357 | 295 (83%) | 28 (8%) | 10 (3%) | 24 (7%) |

a Cord blood cortisol and the ratio of cord blood cortisol to cortisone were missing for one participant in the NGT group. In the analyses of these outcomes, the total sample size was N=356.

Supplementary Table S2. Sensitivity Analyses Restricting to Only White Children for the Cord Blood Glucocorticoids in Project Viva a

|  | **Minimally Adjusted Model b** | | | **Fully Adjusted Model c** | | |
| --- | --- | --- | --- | --- | --- | --- |
|  | **IH** | **IGT** | **GDM** | **IH** | **IGT** | **GDM** |
| **Cord blood cortisol (nmol/L)** | -2.0 (-86.3, 82.3) | -84.9 (-223.2, 53.5) | 30.0 (-77.3, 137.3) | -3.5 (-87.9, 81.0) | -91.7 (-230.0, 46.6) | 21.6 (-85.8, 128.9) |
| **Cord blood cortisone (nmol/L)** | -5.8 (-42.6, 31.0) | -37.9 (-98.4, 22.5) | -8.3 (-55.2, 38.6) | -3.6 (-40.7, 33.5) | -39.5 (-100.2, 21.3) | -7.1 (-54.3, 40.0) |
| **Cord blood cortisol/cortisone ratio (units)** | -0.01 (-0.28, 0.26) | -0.18 (-0.63, 0.27) | 0.11 (-0.24, 0.46) | -0.02 (-0.30, 0.25) | -0.19 (-0.64, 0.26) | 0.08 (-0.27, 0.43) |

a Sensitivity analyses are only including white children. Reporting β (95% CI) comparing to the reference group, which is women with NGT.

b Adjusted for gestational age and sex.

c Minimally adjusted model additionally adjusted for maternal pre-pregnancy BMI, education (≥college graduate vs. <college graduate), and maternal household income at enrollment (>$70,000 per year vs. ≤$70,000 per year).
